# Supplementary material for: Comparison of RNA isolation methods on RNA-Seq: implications for differential expression and meta-analyses
Source: PubMed Central journal article supplement (PMC7082934; doi:10.1186/s12864-020-6673-2), 2020-03-20
Supplement: 12864_2020_6673_MOESM1_ESM.pdf [file 12864_2020_6673_MOESM1_ESM.pdf]

## Supplementary Information

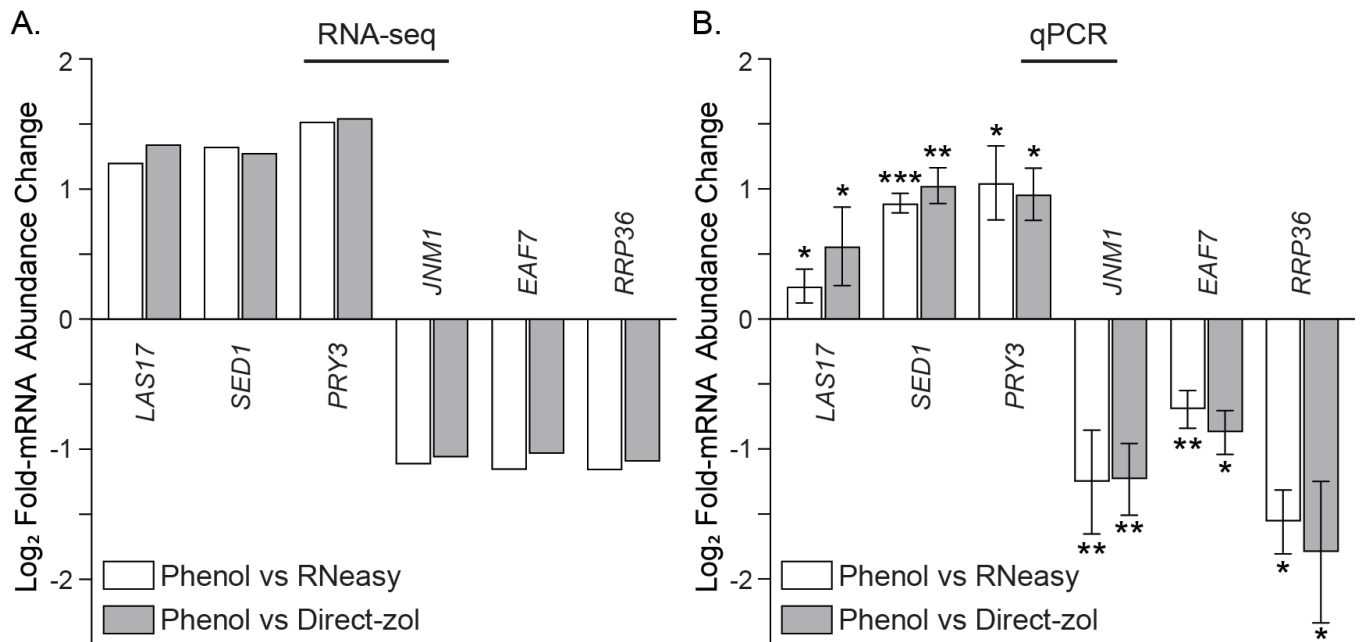

### Supplementary Fig. 1. qPCR validation of representative differentially abundant transcripts.

Representative transcripts with higher or lower transcript abundance in both of the Phenol vs. Kit comparisons as assessed by RNA-seq (**a**) were validated using real-time quantitative (q)PCR on the same identical RNA samples (**b**). Error bars depict the standard deviation of the four biological replicates for the qPCR data. Asterisks represent means that are significantly different from zero (\*  $P < 0.05$ , \*\*  $P < 0.01$ , \*\*\*  $P < 0.001$ , one-sample  $t$ -test).

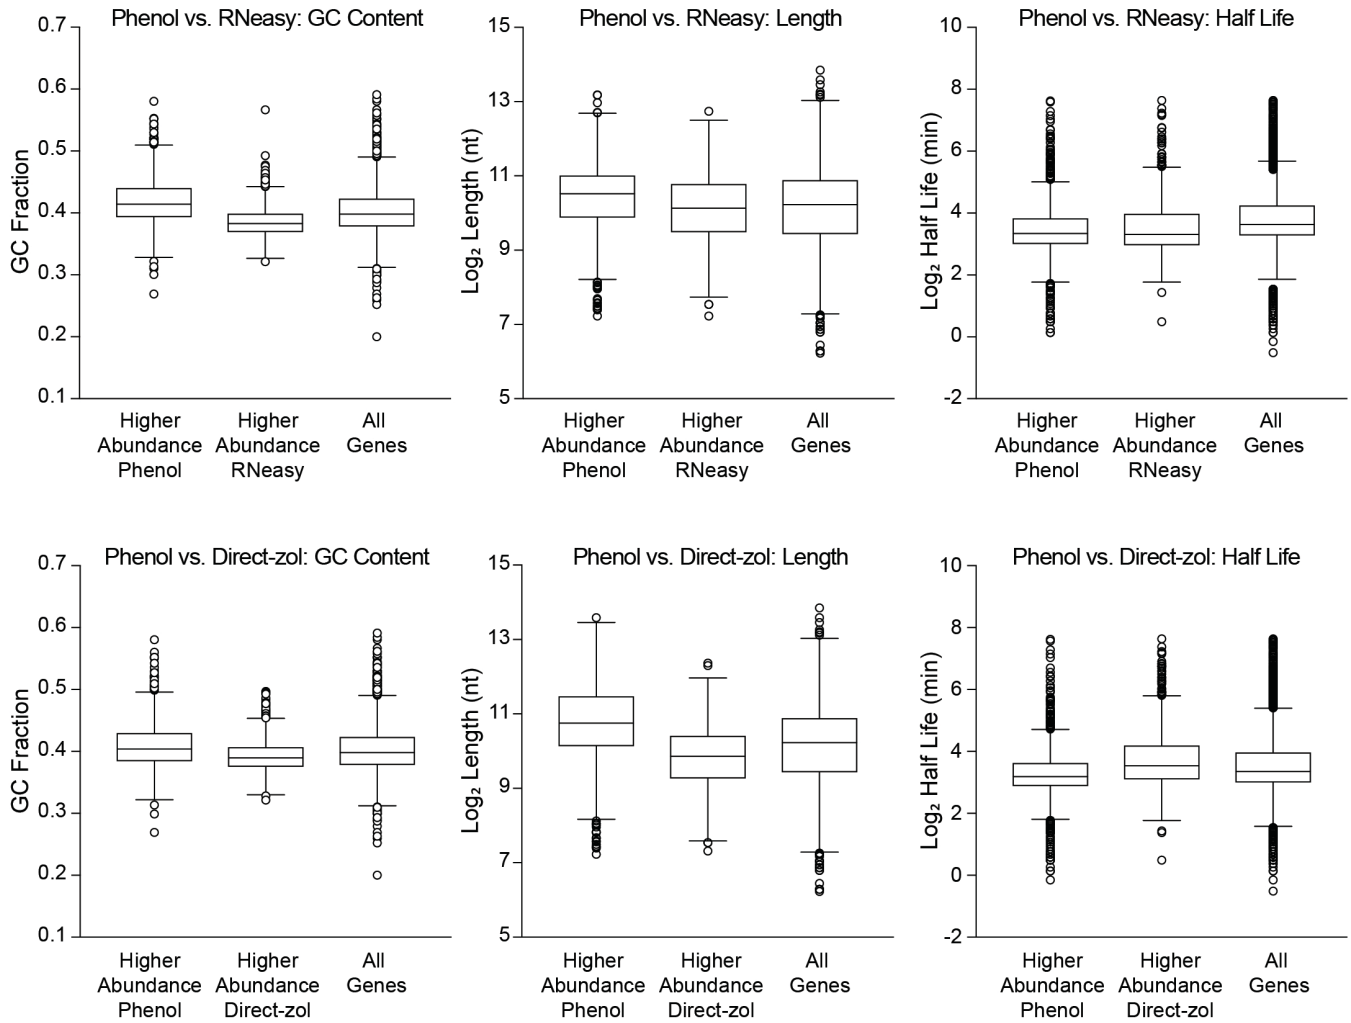

**Supplementary Fig. 2. Properties of transcripts with differential abundance depending upon RNA isolation method.** Boxplots depict the GC content (left), transcript length (middle), and *in vivo* half-life (obtained from [1]) for all genes with significantly higher abundance relative to their comparison group (FDR < 0.01) and all genes that passed filtering thresholds for differential expression analysis. For the Phenol vs. RNeasy comparisons, mean differences were significant by Mann Whitney *U* test for GC content ( $P < 1 \times 10^{-15}$ ) and length ( $P < 1 \times 10^{-15}$ ). For the Phenol vs. Direct-zol comparisons, mean differences were significant by Mann Whitney *U* test for GC content ( $P < 1 \times 10^{-15}$ ), length ( $P < 1 \times 10^{-15}$ ), and half-life ( $P < 1 \times 10^{-15}$ ).

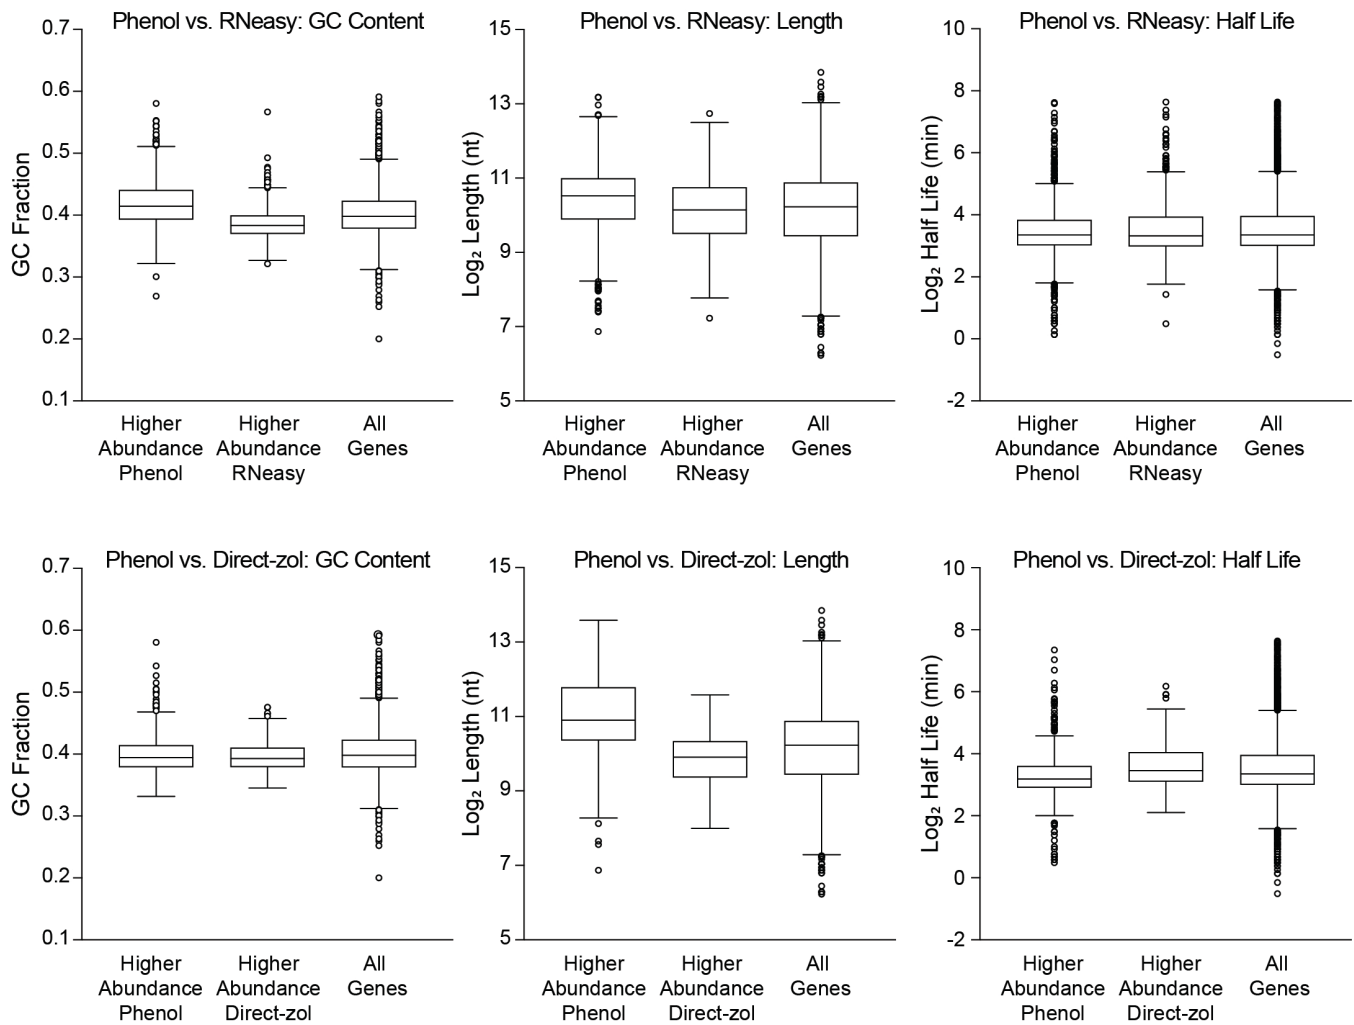

**Supplementary Fig. 3. Properties of transcripts with differential abundance when RIN is included as a factor.** Boxplots depict the GC content (left), transcript length (middle), and *in vivo* half-life (obtained from [1]) for all genes with significantly higher abundance relative to their comparison group (FDR < 0.01) with RIN included as a factor in the edgeR model, as well as all genes that passed filtering thresholds for differential expression analysis. For the Phenol vs. RNeasy comparisons, mean differences were significant by Mann Whitney *U* test for GC content ( $P < 1 \times 10^{-15}$ ) and length ( $P < 1 \times 10^{-15}$ ). For the Phenol vs. Direct-zol comparisons, mean differences were significant by Mann Whitney *U* test for length ( $P < 1 \times 10^{-15}$ ), and half-life ( $P = 4 \times 10^{-8}$ ).

**Supplementary Table 1. RNA concentrations and integrity (RIN) values.**

| Sample ID                  | Concentration<br>(ng / $\mu$ l) | RIN |
|----------------------------|---------------------------------|-----|
| Phenol unstressed Rep1     | 1,100                           | 9.9 |
| Phenol unstressed Rep2     | 1,080                           | 9.9 |
| Phenol unstressed Rep3     | 960                             | 9.9 |
| Phenol unstressed Rep4     | 720                             | 10  |
| Phenol heat shock Rep1     | 610                             | 10  |
| Phenol heat shock Rep2     | 710                             | 10  |
| Phenol heat shock Rep3     | 770                             | 10  |
| Phenol heat shock Rep4     | 610                             | 10  |
| RNeasy unstressed Rep1     | 580                             | 9.8 |
| RNeasy unstressed Rep2     | 470                             | 10  |
| RNeasy unstressed Rep3     | 530                             | 9.9 |
| RNeasy unstressed Rep4     | 460                             | 9.7 |
| RNeasy heat shock Rep1     | 400                             | 9.7 |
| RNeasy heat shock Rep2     | 460                             | 9.6 |
| RNeasy heat shock Rep3     | 430                             | 9.8 |
| RNeasy heat shock Rep4     | 360                             | 9.8 |
| Direct-zol unstressed Rep1 | 590                             | 9.4 |
| Direct-zol unstressed Rep2 | 470                             | 9.4 |
| Direct-zol unstressed Rep3 | 620                             | 9.5 |
| Direct-zol unstressed Rep4 | 330                             | 9.3 |
| Direct-zol heat shock Rep1 | 260                             | 9.0 |
| Direct-zol heat shock Rep2 | 260                             | 9.4 |
| Direct-zol heat shock Rep3 | 560                             | 9.3 |
| Direct-zol heat shock Rep4 | 320                             | 9.4 |

**Supplementary Table 2. Summary of mapping statistics.**

| Sample ID                  | Input Reads <sup>1</sup> | % Uniquely Mapped | % Mapped |
|----------------------------|--------------------------|-------------------|----------|
| Phenol unstressed Rep1     | 13,270,392               | 83.58             | 96.21    |
| Phenol unstressed Rep2     | 12,695,531               | 83.88             | 95.76    |
| Phenol unstressed Rep3     | 12,856,634               | 85.13             | 96.32    |
| Phenol unstressed Rep4     | 15,327,828               | 84.20             | 95.97    |
| Phenol heat shock Rep1     | 10,900,974               | 86.5              | 96.57    |
| Phenol heat shock Rep2     | 13,452,555               | 86.47             | 96.83    |
| Phenol heat shock Rep3     | 14,946,326               | 87.32             | 96.82    |
| Phenol heat shock Rep4     | 19,514,083               | 87.19             | 96.89    |
| RNeasy unstressed Rep1     | 16,773,488               | 78.47             | 95.77    |
| RNeasy unstressed Rep2     | 18,735,607               | 81.06             | 95.89    |
| RNeasy unstressed Rep3     | 13,006,805               | 81.41             | 95.57    |
| RNeasy unstressed Rep4     | 20,186,658               | 80.53             | 95.38    |
| RNeasy heat shock Rep1     | 12,162,093               | 81.63             | 95.76    |
| RNeasy heat shock Rep2     | 13,405,344               | 82.18             | 96.3     |
| RNeasy heat shock Rep3     | 16,331,674               | 83.91             | 95.62    |
| RNeasy heat shock Rep4     | 22,683,053               | 80.05             | 95.87    |
| Direct-zol unstressed Rep1 | 16,815,144               | 86.38             | 96.91    |
| Direct-zol unstressed Rep2 | 17,016,270               | 87.04             | 96.95    |
| Direct-zol unstressed Rep3 | 11,598,964               | 85.87             | 96.73    |
| Direct-zol unstressed Rep4 | 14,150,816               | 87.43             | 96.83    |
| Direct-zol heat shock Rep1 | 14,678,584               | 88.02             | 96.72    |
| Direct-zol heat shock Rep2 | 16,124,462               | 88.79             | 97.27    |
| Direct-zol heat shock Rep3 | 16,753,180               | 87.92             | 96.89    |
| Direct-zol heat shock Rep4 | 21,019,701               | 87.75             | 97.14    |

<sup>1</sup> Only reads surviving trimming were used as the input for STAR mapping.

**Supplementary Table 3. Correlation coefficient (*r*) for log<sub>2</sub> fold-abundance changes versus each factor.**

| Comparison <sup>1</sup>       | Fraction GC | Transcript Length | Transcript Half Life <sup>2</sup> |
|-------------------------------|-------------|-------------------|-----------------------------------|
| Phenol versus RNeasy          | 0.32        | 0.06              | -0.02                             |
| Phenol versus Direct-zol      | 0.14        | 0.23              | -0.14                             |
| Phenol versus RNeasy: RIN     | 0.30        | 0.06              | -0.01                             |
| Phenol versus Direct-zol: RIN | 0.02        | 0.18              | -0.03                             |

<sup>1</sup> Comparisons were done either with or without RIN included as a factor in edgeR.

<sup>2</sup> Half-life estimates from Neymotin et al. [1].

**Supplementary Table 4. Log<sub>2</sub> fold-abundance changes versus each factor.**

| Phenol vs. RNeasy     |                              |             |                   |                                   |
|-----------------------|------------------------------|-------------|-------------------|-----------------------------------|
| Gene <sup>1</sup>     | Log <sub>2</sub> Fold-Change | Fraction GC | Transcript Length | Transcript Half Life <sup>2</sup> |
| YBR116C               | 2.13                         | 0.40        | 528               | 10.4                              |
| YLR342W-A             | 1.91                         | 0.31        | 174               | 10.4                              |
| YNL194C               | 1.87                         | 0.44        | 906               | 9.9                               |
| YPR192W               | 1.66                         | 0.51        | 918               | 31.9                              |
| YJR146W               | 1.59                         | 0.48        | 354               | 15.8                              |
| YDL078C               | 0.00                         | 0.44        | 1032              | 17.1                              |
| YOR018W               | 0.00                         | 0.39        | 2514              | 6.3                               |
| YHL031C               | 0.00                         | 0.46        | 672               | 9.8                               |
| YGR109W-B             | 0.00                         | 0.41        | 4644              | 2.3                               |
| YKR038C               | 0.00                         | 0.44        | 1161              | 12.4                              |
| YKL082C               | -1.16                        | 0.38        | 1305              | 5.1                               |
| YNL136W               | -1.16                        | 0.38        | 1278              | 7                                 |
| YOR287C               | -1.16                        | 0.37        | 903               | 10                                |
| YER038W-A             | -1.16                        | 0.44        | 381               | 2                                 |
| YMR299C               | -1.17                        | 0.36        | 939               | 38.3                              |
| Phenol vs. Direct-zol |                              |             |                   |                                   |
| Gene                  | Log <sub>2</sub> Fold-Change | Fraction GC | Transcript Length | Transcript Half Life <sup>2</sup> |
| YER190W               | 5.25                         | 0.46        | 5046              | 6.9                               |
| YPL060C-A             | 2.29                         | 0.33        | 3315              | 11.7                              |
| YDR535C               | 2.01                         | 0.42        | 501               | 8.5                               |
| YNL194C               | 1.89                         | 0.44        | 906               | 9.9                               |
| YPR202W               | 1.89                         | 0.38        | 717               | 13.6                              |
| YLR397C               | 0.00                         | 0.42        | 2343              | 9.5                               |
| YGR232W               | 0.00                         | 0.39        | 687               | 43.2                              |
| YOR313C               | 0.00                         | 0.36        | 1017              | 8.5                               |
| YOR147W               | 0.00                         | 0.35        | 1869              | 14.2                              |
| YER045C               | 0.00                         | 0.41        | 1470              | 6.8                               |
| YDR397C               | -1.21                        | 0.44        | 441               | 20                                |
| YPR200C               | -1.23                        | 0.38        | 393               | 29.1                              |
| YMR173W-A             | -1.27                        | 0.39        | 1185              | 21.4                              |
| YBL043W               | -1.36                        | 0.43        | 774               | 7.1                               |
| YKL065W-A             | -1.78                        | 0.31        | 222               | 34.4                              |

<sup>1</sup> The genes selected had either the five highest, five lowest, or no abundance changes for the relevant Phenol vs. Kit comparisons.

<sup>2</sup> Half-life estimates from Neymotin et al. [1].

## References

1. Neymotin B, Athanasiadou R, Gresham D. Determination of in vivo RNA kinetics using RATE-seq. *RNA*. 2014;20(10):1645-1652. doi: 10.1261/rna.045104.114 PMID: 25161313
